# Supplementary material for: Odd–even effects of an asymmetric dimer on the double-twist structure in an amorphous blue phase
Source: Royal Society of Chemistry journal article supplement (doi:10.1039/c6tc03032g), 2016-01-01
Supplement: c6tc03032g1.pdf [file c6tc03032g1.pdf]

## Electronic supporting information

### Odd-even effects of an asymmetric dimer on the double-twist structure in an amorphous blue phase

Tetsu Hirose<sup>a,b</sup> and Atsushi Yoshizawa<sup>\*a</sup>

*<sup>a</sup>Department of Frontier Materials Chemistry, Graduate School of Science and  
Technology, Hirosaki University, 3 Bunkyo-cho, Hirosaki, Aomori, 036-8561, Japan*

*E-mail: ayoshiza@hirosaki-u.ac.jp*

*<sup>b</sup>Tohoku Chemical Corporation, 1-3-1 Kanda, Hirosaki, Aomori, 036-8655, Japan*

1. Fig. S-1 Phase transition behaviour of chiral mixtures consisting of host LC [(90-X) wt%], **I-8** (X wt%), and **ISO-(6OBA)<sub>2</sub>** (10 wt%).
2. Fig. S-2 Optical transmittances of the mixture consisting of host LC (88.4 wt%), **I-8** (1.6 wt%) and **ISO-(6OBA)<sub>2</sub>** (10 wt%) as a function of an AC field at 60 Hz in the induced cubic BP at 65 °C. Circles show transmittances when the electric field was set at 0° to the analyzer. Triangles show those when the electric field was set at 45° to the polarizing axis of both polarizers.

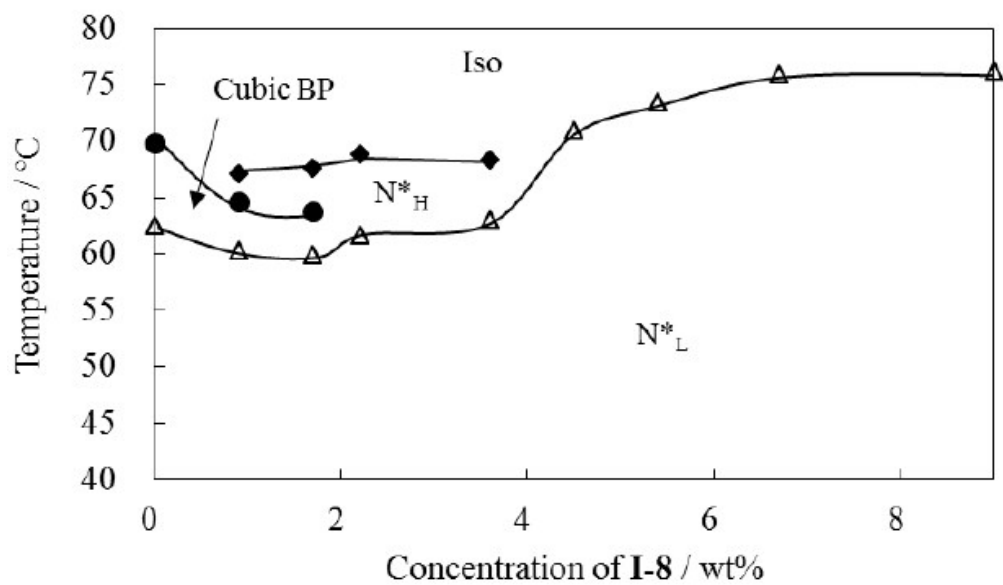

Fig. S-1 Phase transition behaviour of chiral mixtures consisting of host LC [(90-X) wt%], I-8 (X wt%), and ISO-(6OBA)<sub>2</sub> (10 wt%).

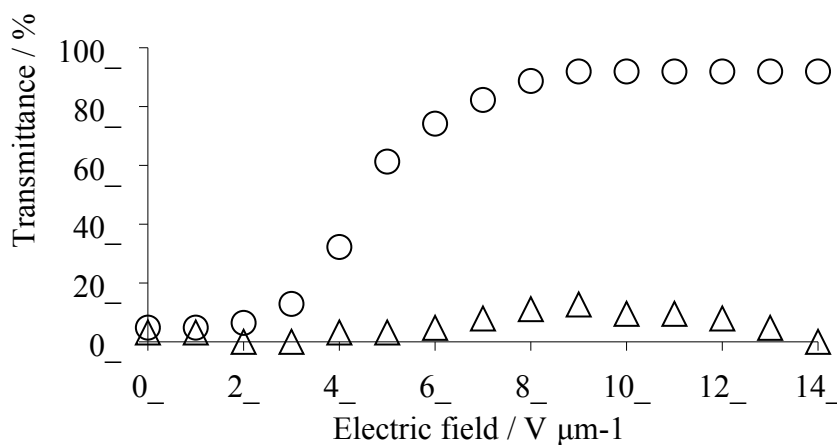

Fig. S-2 Optical transmittances of the mixture consisting of host LC (88.4 wt%), **I-8** (1.6 wt%) and **ISO-(6OBA)<sub>2</sub>** (10 wt%) as a function of an AC field at 60 Hz in the induced cubic BP at 65 °C. Circles show transmittances when the electric field was set at 0° to the analyzer. Triangles show those when the electric field was set at 45° to the polarizing axis of both polarizers.
